# Supplementary material
Source: Elsevier journal article supplement (https://www.sciencedirect.com/science/article/pii/S2173578621001360)
Supplement: mmc1 [file S2173578621001360:mmc1.pdf]

## ¿Existe concordancia entre Vejiga Hiperactiva e Hiperactividad del Detrusor en varones con síntomas predominantemente de llenado derivados a Unidades de Urología Funcional y Urodinámica?

### MATERIAL SUPLEMENTARIO

#### Criterios de exclusión

|                                                                                                                                                                                                                                                                                                                                                                   |
|-------------------------------------------------------------------------------------------------------------------------------------------------------------------------------------------------------------------------------------------------------------------------------------------------------------------------------------------------------------------|
| Paciente con sospecha clínica de cáncer de próstata (por tacto rectal o PSA)                                                                                                                                                                                                                                                                                      |
| Paciente que presente alguno de los siguientes antecedentes urológicos:<br>o infecciones urinarias recurrentes<br>o litiasis vesical<br>o estenosis uretral<br>o cistitis intersticial<br>o síndrome del dolor pélvico crónico /prostatitis<br>o cirugía prostática, uretral o vesical<br>o cáncer de próstata, vejiga, uretra o recto<br>o radioterapia pelviana |
| Paciente con patología neurológica objetiva (lesión medular, enfermedad de Parkinson, esclerosis múltiple, etc.)                                                                                                                                                                                                                                                  |
| Paciente que no pueda cumplir con los requisitos establecidos en el protocolo (paciente no colaborador)                                                                                                                                                                                                                                                           |

#### **Variables del estudio**

|   |                                                      |   |
|---|------------------------------------------------------|---|
| 1 | Diario miccional de 3 días .....                     | 2 |
| 2 | Cuestionarios.....                                   | 2 |
| 3 | Variables de estudio urodinámico .....               | 3 |
| 4 | Procedimiento de lectura centralizada de datos ..... | 4 |

## ¿Existe concordancia entre Vejiga Hiperactiva e Hiperactividad del Detrusor en varones con síntomas predominantemente de llenado derivados a Unidades de Urología Funcional y Urodinámica?

### 1. Diario miccional de 3 días

[https://www.aeu.es/PDF/DIARIO\\_MICCIONAL\\_3\\_DIAS.pdf](https://www.aeu.es/PDF/DIARIO_MICCIONAL_3_DIAS.pdf)

### 2 Cuestionarios

Se utilizaron los siguientes cuestionarios validados, en sus versiones adaptadas en español:

- *International Prostate Symptom Score (I-PSS)* (Badía X, et al. Urology. 1998;52(4):614-20).  
Cuestionario que evalúa mediante 7 ítems los síntomas urinarios, con 3 ítems destinados a los de llenado (I-PSS-SLL) y 4 a los de vaciado (I-PSS-SV), así como el impacto de estos síntomas en la CVRS del paciente (ítem 8). La puntuación va de 0 (asintomático) a 35 puntos (con muchos síntomas), lo que permite clasificar a los pacientes en 3 grupos: 0-7 puntos (síntomas leves), 8-19 puntos (síntomas moderados) y 20-35 puntos (síntomas graves)
- Cuestionario de Auto-evaluación del Control de la Vejiga (CACV) (España Pons M, et al. Actas Urol Esp. 2006;30:1017-24), que consta de 8 ítems divididos en 2 dimensiones: “síntomas” y “molestias”. La puntuación de cada una de las dos dimensiones de que consta (“molestias” y “síntomas”) oscila entre 0 y 12 puntos. Se considerará que una persona podría tener VH cuando la puntuación en cualquiera de las dos escalas es superior a 6 puntos y se considerará que tiene “urgencia” cuando la puntuación del ítem 1 sea igual o superior a 2 puntos (rango entre 0 y 3). Se dispondrá además de una evaluación del grado de molestia que ocasiona la urgencia (entre 0 y 3) y la VH (entre 0 y 12).

Variables y definiciones del estudio

## ¿Existe concordancia entre Vejiga Hiperactiva e Hiperactividad del Detrusor en varones con síntomas predominantemente de llenado derivados a Unidades de Urología Funcional y Urodinámica?

### 3 Variables de estudio urodinámico

#### 3.1. Flujometría libre:

- Volumen emitido-VV (ml)
- Flujo máximo-Qmax (ml/seg)
- Tiempo de flujo urinario ■ El tiempo de flujo es el tiempo de la micción durante el cual se puede detectar flujo
- Morfología de la curva (normal / interrumpida / picos / meseta)
- Residuo postmiccional-RPM (ml)

#### 3.2 Cistomanometría (CMG)

- Capacidad vesical: Capacidad Cistomanométrica Máxima-CCMax (ml)
- Acomodación vesical: se calcula dividiendo el incremento del volumen ( $\Delta V$ ) entre el incremento en la presión del detrusor ( $\Delta P_{det}$ ) correspondiente a este incremento de volumen. Se expresa en ml/cm de H<sub>2</sub>O.  $Acomodación = \Delta V / \Delta P_{det}^1$
- Sensibilidad
  - Primera sensación al llenado - FSF (ml): la sensación que tiene el paciente, durante la cistomanometría de llenado, cuando se hace consciente de que su vejiga se está llenando
  - Fuerte deseo miccional (ml): se define, durante la cistomanometría de llenado, como un deseo persistente sin miedo al escape de orina.
  - Urgencia (ml) (sí/no): súbito e irresistible deseo de orinar
- Actividad del detrusor en el llenado:
  - Contracciones involuntarias del detrusor (sí/no)
  - Volumen de llenado al que aparecen contracciones involuntarias (ml)
  - Presión del detrusor máxima de la contracción involuntaria (cm H<sub>2</sub>O)

---

<sup>1</sup> La ICS recomienda que se usen dos puntos estándares para el cálculo de la acomodación. Ambos se miden excluyendo cualquier contracción del detrusor.

- La presión del detrusor al inicio del llenado vesical y el correspondiente volumen inicial (usualmente 0).
- La presión de detrusor y el correspondiente volumen vesical a la capacidad cistomanométrica o inmediatamente antes del inicio de cualquier contracción del detrusor que cause fuga significativa ( y por ello cause disminución del volumen vesical afectando al cálculo de la acomodación). Ambos puntos se miden excluyendo cualquier contracción del detrusor.

## **¿Existe concordancia entre Vejiga Hiperactiva e Hiperactividad del Detrusor en varones con síntomas predominantemente de llenado derivados a Unidades de Urología Funcional y Urodinámica?**

- Incontinencia urinaria:
  - Incontinencia urinaria de urgencia (IUU) (sí/no)
  - Incontinencia urinaria de esfuerzo (IUE) (sí / no). Se observa durante el llenado cistomanométrico y se define como el escape involuntario de orina durante el aumento de presión abdominal, en ausencia de contracción del detrusor.

### **3.3 Estudios de Presión Flujo o Instantánea miccional.**

- Flujo máximo-Qmax (Pdet) (ml/s)
- Presión del Detrusor a Qmax (cm H<sub>2</sub>O)
- Micción con prensa (uso de prensa abdominal para orinar) (sí /no)
- Morfología de la curva de presión flujo (normal/interrumpida/picos/meseta)
- Residuo postmiccional (ml)

## **4 Procedimiento de lectura centralizada de datos**

Se realizó lectura centralizada de las siguientes variables urodinámicas:

- **Flujometría:**
  - Volumen emitido- VV (ml).
  - Morfología de la curva (Normal, Interrumpida, Picos o Meseta).
- **Cistomanometría:**
  - Sensibilidad de llenado:
    - Primera sensación al llenado-FSF: cuantitativo (ml) y cualitativo (sí/no).
    - Fuerte deseo miccional (sí/no)
    - Urgencia: cuantitativo (ml) y cualitativo (sí/no)
  - Actividad del detrusor en el llenado: contracciones involuntarias del detrusor.
  - Incontinencia Urinaria de Urgencia (sí/no)
- **Estudios de presión flujo:** Micción con prensa (sí/no)
